# Supplementary material for: Effect of Multispectral Pulsed Light-Emitting Diodes on the Growth, Photosynthetic and Antioxidant Response of Baby Leaf Lettuce (Lactuca sativa L.)
Source: PubMed Central journal article supplement (PMC8069217; doi:10.3390/plants10040762), 2021-04-13
Supplement: plants-10-00762-s001.pdf [file plants-10-00762-s001.pdf]

### Supplementary Materials:

**Table S1.** The correlation matrix (Pearson (n)) between growth indices, photosynthetic and antioxidant properties in lettuce.

| Variables | LA           | FW           | DW           | Pn           | Chl a        | Chl b        | Carot        | Phenols      | DPPH         | ABTS         | FRAP         |
|-----------|--------------|--------------|--------------|--------------|--------------|--------------|--------------|--------------|--------------|--------------|--------------|
| LA        | <b>1</b>     | <b>0.976</b> | <b>0.959</b> | <b>0.656</b> | <b>0.599</b> | <b>0.557</b> | <b>0.576</b> | 0.067        | 0.324        | 0.276        | 0.078        |
| FW        | <b>0.976</b> | <b>1</b>     | <b>0.965</b> | <b>0.579</b> | 0.488        | 0.443        | 0.460        | -0.066       | 0.266        | 0.128        | -0.048       |
| DW        | <b>0.959</b> | <b>0.965</b> | <b>1</b>     | <b>0.632</b> | <b>0.576</b> | <b>0.529</b> | <b>0.553</b> | 0.047        | 0.313        | 0.238        | 0.084        |
| Pn        | <b>0.656</b> | <b>0.579</b> | <b>0.632</b> | <b>1</b>     | <b>0.709</b> | <b>0.684</b> | <b>0.704</b> | 0.450        | <b>0.572</b> | <b>0.624</b> | 0.506        |
| Chl a     | <b>0.599</b> | 0.488        | <b>0.576</b> | <b>0.709</b> | <b>1</b>     | <b>0.995</b> | <b>0.999</b> | <b>0.792</b> | 0.315        | <b>0.842</b> | <b>0.773</b> |
| Chl b     | <b>0.557</b> | 0.443        | <b>0.529</b> | <b>0.684</b> | <b>0.995</b> | <b>1</b>     | <b>0.994</b> | <b>0.819</b> | 0.312        | <b>0.855</b> | <b>0.796</b> |
| Carot     | <b>0.576</b> | 0.460        | <b>0.553</b> | <b>0.704</b> | <b>0.999</b> | <b>0.994</b> | <b>1</b>     | <b>0.812</b> | 0.291        | <b>0.857</b> | <b>0.798</b> |
| Phenols   | 0.067        | -0.066       | 0.047        | 0.450        | <b>0.792</b> | <b>0.819</b> | <b>0.812</b> | <b>1</b>     | 0.136        | <b>0.908</b> | <b>0.974</b> |
| DPPH      | 0.324        | 0.266        | 0.313        | <b>0.572</b> | 0.315        | 0.312        | 0.291        | 0.136        | <b>1</b>     | 0.225        | 0.081        |
| ABTS      | 0.276        | 0.128        | 0.238        | <b>0.624</b> | <b>0.842</b> | <b>0.855</b> | <b>0.857</b> | <b>0.908</b> | 0.225        | <b>1</b>     | <b>0.899</b> |
| FRAP      | 0.078        | -0.048       | 0.084        | 0.506        | <b>0.773</b> | <b>0.796</b> | <b>0.798</b> | <b>0.974</b> | 0.081        | <b>0.899</b> | <b>1</b>     |

Values in bold are different from 0 with a significance level  $\alpha=0.05$ . LA, leaf area; FW, fresh weight; DW, dry weight; Pn, net photosynthetic rate; Chl a, chlorophyll a; Chl b, chlorophyll b; Carot, carotenoid; Phenols, total phenolic compounds; DPPH, 2-diphenyl-1-picrylhydrazyl radical scavenging activity; ABTS, (2,20 -azino-bis (3-ethylbenzothiazoline-6-sulphonic acid)) diammonium salt radical scavenging activity; FRAP, Fe<sup>2+</sup> reducing antioxidant power assay.
